# Supplementary material
Source: MDPI journal article supplement (https://www.mdpi.com/2313-0105/4/2/26)
Supplement: s1 [file s1 › batteries-308697-SI.pdf]

# Supporting Information for

## Formation and Stability of Interface between Garnet-type Ta-doped $\text{Li}_7\text{La}_3\text{Zr}_2\text{O}_{12}$ Solid Electrolyte and Lithium Metal Electrode

Ryoji Inada\*, Satoshi Yasuda, Hiromasa Hosokawa, Masaya Saito, Tomohiro Tojo, Yoji Sakurai

Department of Electrical and Electronic Information Engineering, Toyohashi University of Technology, 1-1 Hibarigaoka, Tempaku-cho, Toyohashi, Aichi 441-8580, Japan

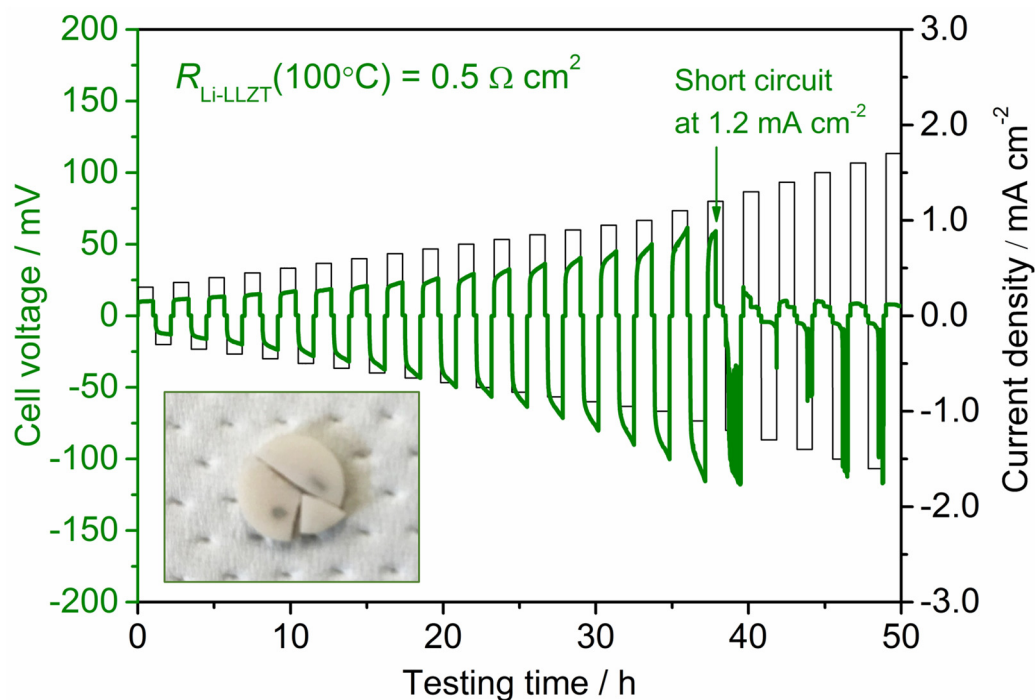

**Figure S1.** Galvanostatic cycling at 100°C for Li/LLZT/Li cell with  $R_{\text{Li-LLZT}} = 25 \, \Omega\text{cm}^2$  at 27°C and  $0.5 \, \Omega\text{cm}^2$  at 100°C. Short circuit in the cell is occurred at current density of  $1.2 \, \text{mAcm}^{-2}$ , which is three times higher than that for the cell tested at 25°C in Figure 6(b). An inset in the graph is the photo of LLZT pellet removed from the cell after occurring short circuit.

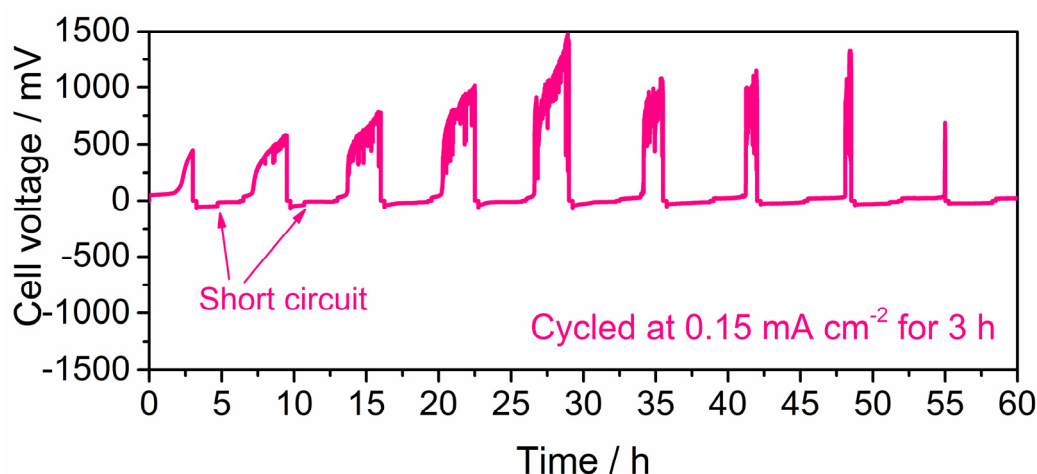

**Figure S2.** Galvanostatic cycling at 25°C for Li/LLZT/Li cell with  $R_{\text{Li-LLZT}}(27^\circ\text{C}) = 28 \Omega\text{cm}^2$  tested at  $0.15 \text{ mAcm}^{-2}$  for 3 h. The cell could not be cycled stably and short circuit is occurred during the cycling.

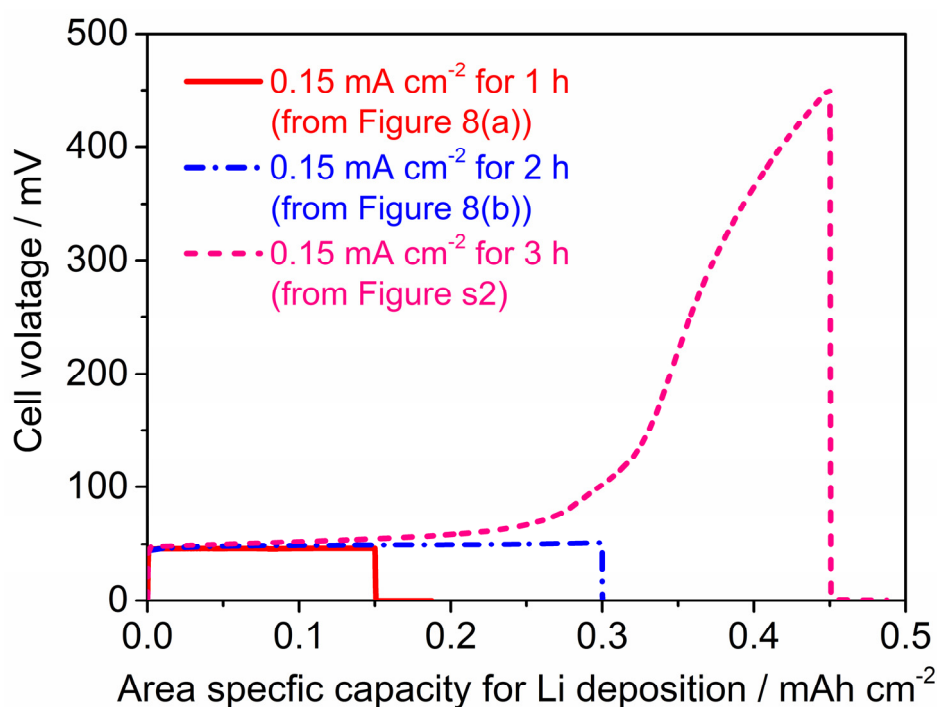

**Figure S3.** Cell voltage at 25°C and  $0.15 \text{ mAcm}^{-2}$  for 1, 2 and 3 h in Li/LLZT/Li cells as a function of area specific capacity for Li deposition. The plotted data are calculated from the data at the 1st cycle in Figure 4(a), Figure 4(b) and Figure S2. At  $0.15 \text{ mAcm}^{-2}$  for 1 and 2 h, the cell was stably cycled without occurring short circuit, but at  $0.15 \text{ mAcm}^{-2}$  for 3 h, the cell could not be cycled stably as shown in Figure S2. Increase in cell voltage becomes significant at area specific capacity above  $0.3 \text{ mAh cm}^{-2}$ .
